# Supplementary material for: Improving the translation of search strategies using the Polyglot Search Translator: a randomized controlled trial
Source: PubMed Central journal article supplement (PMC7069833; doi:10.5195/jmla.2020.834), 2020-04-01
Supplement: jmla-108-195-s002.pdf [file jmla-108-195-s002.pdf]

## Improving the translation of search strategies using the Polyglot Search Translator: a randomized controlled trial

Justin Michael Clark; Sharon Sanders; Matthew Carter; David Honeyman; Gina Cleo; Yvonne Auld; Debbie Booth; Patrick Condrón; Christine Dalais; Sarah Bateup; Bronwyn Linthwaite; Nikki May; Jo Munn; Lindy Ramsay; Kirsty Rickett; Cameron Rutter; Angela Smith; Peter Sondergeld; Margie Wallin; Mark Jones; Elaine Beller

### APPENDIX B

**Table S1** Results of searches conducted to find systematic review search strings used in the trial

| Search strategy used to identify the reviews                                                                                                      | Number of reviews screened | Number of reviews used in the trial |
|---------------------------------------------------------------------------------------------------------------------------------------------------|----------------------------|-------------------------------------|
| Cochrane intervention reviews                                                                                                                     |                            |                                     |
| "Cochrane Database Syst Rev"[Journal]<br>(PubMed, limited to last 5 years)                                                                        | 17                         | 5 (1-5)                             |
| Drug intervention review                                                                                                                          |                            |                                     |
| "systematic review"[Title] AND<br>intervention[Title/ Abstract]<br>NOT "Cochrane Database Syst Rev"[Journal]<br>(PubMed, limited to last 5 years) | 46                         | 2 (6, 7)                            |
| Non-drug intervention reviews                                                                                                                     |                            |                                     |
| "systematic review"[Title] AND<br>intervention[Title/ Abstract]<br>NOT "Cochrane Database Syst Rev"[Journal]<br>(PubMed, limited to last 5 years) | 59                         | 3 (8-10)                            |
| Diagnostic reviews                                                                                                                                |                            |                                     |
| "systematic review"[Title] AND<br>diagnostic[Title/ Abstract]<br>NOT "Cochrane Database Syst Rev"[Journal]<br>(PubMed, limited to last 5 years)   | 29                         | 3 (11-13)                           |
| Diagnostic reviews                                                                                                                                |                            |                                     |
| "systematic review"[Title] AND<br>prevalence[Title/ Abstract]<br>NOT "Cochrane Database Syst Rev"[Journal]<br>(PubMed, limited to last 5 years)   | 21                         | 2 (14, 15)                          |

| Search strategy used to identify the reviews                                                                                                                                                                                     | Number of reviews screened | Number of reviews used in the trial |
|----------------------------------------------------------------------------------------------------------------------------------------------------------------------------------------------------------------------------------|----------------------------|-------------------------------------|
| Prognostic reviews<br><br>"systematic review"[Title] AND<br>prognosis[Title/ Abstract]<br><br>NOT "Cochrane Database Syst Rev"[Journal]<br>PubMed,<br>(limited to last 5 years)                                                  | 9                          | 2 (16, 17)                          |
| Health technology assessments<br><br>(Health Technology Assessment Database (HTA),<br><a href="https://www.crd.york.ac.uk/CRDWeb/">https://www.crd.york.ac.uk/CRDWeb/</a> ,<br>(*), limited to 2012 to 2017, and published HTAs) | 20                         | 3 (18-20)                           |
