# Supplementary material for: Improving the translation of search strategies using the Polyglot Search Translator: a randomized controlled trial
Source: PubMed Central journal article supplement (PMC7069833; doi:10.5195/jmla.2020.834), 2020-04-01
Supplement: jmla-108-195-s005.pdf [file jmla-108-195-s005.pdf]

## Improving the translation of search strategies using the Polyplot Search Translator: a randomized controlled trial

Justin Michael Clark; Sharon Sanders; Matthew Carter; David Honeyman; Gina Cleo; Yvonne Auld; Debbie Booth; Patrick Condrón; Christine Dalais; Sarah Bateup; Bronwyn Linthwaite; Nikki May; Jo Munn; Lindy Ramsay; Kirsty Rickett; Cameron Rutter; Angela Smith; Peter Sondergeld; Margie Wallin; Mark Jones; Elaine Beller

### APPENDIX E

**Table S2** Search stings ranked by order of complexity (1=least complex, 20=most complex)

| Search no.* | Search string       | Complexity |
|-------------|---------------------|------------|
| 8           | Attridge 2014 [2]   | 20         |
| 10          | Butler 2016 [19]    | 19         |
| 2           | Crawford 2016 [3]   | 18         |
| 4           | Fredericks 2017 [8] | 17         |
| 15          | Allred 2017 [1]     | 16         |
| 7           | Nagler 2012 [6]     | 15         |
| 13          | Cadieux 2016 [11]   | 14         |
| 11          | Wardlaw 2014 [20]   | 13         |
| 17          | Calvo 2016 [12]     | 12         |
| 19          | Vaidya 2014 [13]    | 11         |
| 16          | Eggerding 2015 [16] | 10         |
| 6           | Sapkota 2015 [15]   | 9          |
| 14          | Trinh 2015 [7]      | 8          |
| 5           | Palmer 2014 [4]     | 7          |
| 3           | Lahart 2015 [17]    | 6          |
| 1           | van Gils 2016 [10]  | 5          |
| 20          | Althaus 2014 [18]   | 4          |
| 12          | Vaughan 2014 [5]    | 3          |
| 18          | Rossi 2012 [14]     | 2          |
| 9           | Pearce 2013 [9]     | 1          |

\* Reference numbers (e.g., [2]) taken from supplemental Appendix C.
