# Supplementary material for: Improving the translation of search strategies using the Polyglot Search Translator: a randomized controlled trial
Source: PubMed Central journal article supplement (PMC7069833; doi:10.5195/jmla.2020.834), 2020-04-01
Supplement: jmla-108-195-s006.pdf [file jmla-108-195-s006.pdf]

## Improving the translation of search strategies using the Polyplot Search Translator: a randomized controlled trial

Justin Michael Clark; Sharon Sanders; Matthew Carter; David Honeyman; Gina Cleo; Yvonne Auld; Debbie Booth; Patrick Condrón; Christine Dalais; Sarah Bateup; Bronwyn Linthwaite; Nikki May; Jo Munn; Lindy Ramsay; Kirsty Rickett; Cameron Rutter; Angela Smith; Peter Sondergeld; Margie Wallin; Mark Jones; Elaine Beller

### APPENDIX F

**Table S3** Mean time, standard deviations, and mean differences in all times in minutes in search translations

| Translation scenario           | PST-A method translation time (minutes) | SD | Manual method translation time (minutes) | SD | Mean difference |
|--------------------------------|-----------------------------------------|----|------------------------------------------|----|-----------------|
|                                | Mean                                    |    | Mean                                     |    |                 |
| PubMed to Web of Science       | 6                                       | 5  | 11                                       | 8  | -6              |
| PubMed to Scopus               | 20                                      | 20 | 42                                       | 47 | -22             |
| PubMed to MEDLINE              | 18                                      | 14 | 24                                       | 13 | -6              |
| PubMed to Embase               | 25                                      | 15 | 28                                       | 23 | -4              |
| PubMed to Cochrane             | 16                                      | 12 | 27                                       | 14 | -11             |
| PubMed to CINAHL               | 23                                      | 16 | 34                                       | 28 | -11             |
| PubMed to all databases        | 18                                      | 14 | 28                                       | 21 | -10             |
| Ovid MEDLINE to Web of Science | 31                                      | 27 | 42                                       | 38 | -11             |
| Ovid MEDLINE to Scopus         | 57                                      | 55 | 45                                       | 31 | 12              |
| Ovid MEDLINE to PubMed         | 52                                      | 41 | 71                                       | 71 | -18             |
| Ovid MEDLINE to Embase         | 50                                      | 57 | 73                                       | 67 | -23             |
| Ovid MEDLINE to Cochrane       | 24                                      | 17 | 67                                       | 60 | -43             |
| Ovid MEDLINE to CINAHL         | 50                                      | 44 | 79                                       | 99 | -29             |
| Ovid MEDLINE to all databases  | 44                                      | 43 | 63                                       | 67 | -19             |
| All databases                  | 31                                      | 39 | 45                                       | 59 | -14             |

Abbreviation: PST-A=Polyplot Search Translator-assisted; SD=Standard deviation.
