# Supplementary material for: Improving the translation of search strategies using the Polyglot Search Translator: a randomized controlled trial
Source: PubMed Central journal article supplement (PMC7069833; doi:10.5195/jmla.2020.834), 2020-04-01
Supplement: jmla-108-195-s007.pdf [file jmla-108-195-s007.pdf]

## Improving the translation of search strategies using the Polyglot Search Translator: a randomized controlled trial

Justin Michael Clark; Sharon Sanders; Matthew Carter; David Honeyman; Gina Cleo; Yvonne Auld; Debbie Booth; Patrick Condrón; Christine Dalais; Sarah Bateup; Bronwyn Linthwaite; Nikki May; Jo Munn; Lindy Ramsay; Kirsty Rickett; Cameron Rutter; Angela Smith; Peter Sondergeld; Margie Wallin; Mark Jones; Elaine Beller

### APPENDIX G

**Table S4** Totals, means, mean differences, and standard deviations in all errors in search translations

| Translation scenario           | No. of PST-A translated searches | No. of manual translated searches | No. of PST-A errors | No. of manual errors | PST-A errors Mean | SD | Manual errors Mean | SD | Mean difference |
|--------------------------------|----------------------------------|-----------------------------------|---------------------|----------------------|-------------------|----|--------------------|----|-----------------|
| PubMed to Web of Science       | 4                                | 7                                 | 0                   | 0                    | 0                 | 0  | 0                  | 0  | 0               |
| PubMed to Scopus               | 4                                | 4                                 | 5                   | 30                   | 1                 | 1  | 8                  | 12 | -7              |
| PubMed to Ovid MEDLINE         | 14                               | 15                                | 69                  | 157                  | 5                 | 11 | 10                 | 13 | -5              |
| PubMed to Embase               | 6                                | 4                                 | 76                  | 53                   | 13                | 18 | 13                 | 15 | 0               |
| PubMed to Cochrane             | 8                                | 9                                 | 40                  | 58                   | 5                 | 13 | 6                  | 12 | -1              |
| PubMed to CINAHL               | 8                                | 8                                 | 48                  | 40                   | 6                 | 9  | 5                  | 8  | 1               |
| PubMed to all databases        | 44                               | 47                                | 238                 | 338                  | 5                 | 11 | 7                  | 11 | 2               |
| Ovid MEDLINE to Web of Science | 17                               | 15                                | 63                  | 27                   | 4                 | 11 | 2                  | 3  | 2               |
| Ovid MEDLINE to Scopus         | 14                               | 21                                | 29                  | 331                  | 2                 | 3  | 16                 | 27 | -14             |
| Ovid MEDLINE to PubMed         | 42                               | 48                                | 671                 | 979                  | 16                | 24 | 20                 | 32 | -4              |
| Ovid MEDLINE to Embase         | 20                               | 16                                | 243                 | 261                  | 12                | 20 | 16                 | 26 | -4              |
| Ovid MEDLINE to Cochrane       | 19                               | 30                                | 203                 | 701                  | 11                | 18 | 23                 | 35 | -12             |

| Translation scenario              | No. of PST-A translated searches | No. of manual translated searches | No. of PST-A errors | No. of manual errors | PST-A errors Mean | SD | Manual errors Mean | SD | Mean difference |
|-----------------------------------|----------------------------------|-----------------------------------|---------------------|----------------------|-------------------|----|--------------------|----|-----------------|
| Ovid MEDLINE to CINAHL            | 18                               | 15                                | 52                  | 168                  | 3                 | 4  | 11                 | 18 | -8              |
| Ovid MEDLINE to all databases     | 130                              | 145                               | 1,261               | 2,467                | 10                | 18 | 17                 | 29 | -7              |
| All translations to all databases | 174                              | 192                               | 1,499               | 2,805                | 9                 | 17 | 15                 | 26 | -6              |

Abbreviation: PST-A=Polyglot Search Translator-assisted; SD=Standard deviation.

**Table S5** Totals, means, mean differences, and standard deviation in all recall errors in search translations

| Translation scenario           | No. of PST-A translated searches | No. of manual translated searches | No. of PST-A recall errors | No. of manual recall errors | PST-A recall errors Mean | SD | Manual recall errors Mean | SD | Mean difference |
|--------------------------------|----------------------------------|-----------------------------------|----------------------------|-----------------------------|--------------------------|----|---------------------------|----|-----------------|
| PubMed to Web of Science       | 4                                | 7                                 | 0                          | 0                           | 0                        | 0  | 0                         | 0  | 0               |
| PubMed to Scopus               | 4                                | 4                                 | 5                          | 0                           | 1                        | 1  | 0                         | 0  | 1               |
| PubMed to Ovid MEDLINE         | 14                               | 15                                | 67                         | 156                         | 5                        | 11 | 10                        | 13 | -5              |
| PubMed to Embase               | 6                                | 4                                 | 76                         | 52                          | 13                       | 18 | 13                        | 16 | 0               |
| PubMed to Cochrane             | 8                                | 9                                 | 40                         | 57                          | 5                        | 13 | 6                         | 12 | -1              |
| PubMed to CINAHL               | 8                                | 8                                 | 39                         | 16                          | 5                        | 9  | 2                         | 3  | 3               |
| PubMed to all databases        | 44                               | 47                                | 227                        | 281                         | 5                        | 11 | 6                         | 11 | -1              |
| Ovid MEDLINE to Web of Science | 17                               | 15                                | 55                         | 9                           | 3                        | 11 | 1                         | 1  | 2               |
| Ovid MEDLINE to Scopus         | 14                               | 21                                | 25                         | 72                          | 2                        | 3  | 3                         | 6  | -1              |
| Ovid MEDLINE to PubMed         | 42                               | 48                                | 536                        | 718                         | 13                       | 24 | 15                        | 29 | -2              |
| Ovid MEDLINE to Embase         | 20                               | 16                                | 222                        | 160                         | 11                       | 20 | 10                        | 18 | 1               |
| Ovid MEDLINE to Cochrane       | 19                               | 30                                | 160                        | 242                         | 8                        | 18 | 8                         | 19 | 0               |
| Ovid MEDLINE to CINAHL         | 18                               | 15                                | 48                         | 116                         | 3                        | 4  | 8                         | 16 | -5              |

| Translation scenario              | No. of PST-A translated searches | No. of manual translated searches | No. of PST-A recall errors | No. of manual recall errors | PST-A recall errors Mean | SD | Manual recall errors Mean | SD | Mean difference |
|-----------------------------------|----------------------------------|-----------------------------------|----------------------------|-----------------------------|--------------------------|----|---------------------------|----|-----------------|
| Ovid MEDLINE to all databases     | 130                              | 145                               | 1,046                      | 1,317                       | 8                        | 18 | 9                         | 21 | -1              |
| All translations to all databases | 174                              | 192                               | 1,273                      | 1,598                       | 7                        | 17 | 8                         | 19 | -1              |

Abbreviation: PST-A=Polyglot Search Translator-assisted; SD=Standard deviation.

**Table S6** Totals, means, mean differences, and standard deviation in all precision errors in search translations

| Translation scenario              | No. of PST-A translated searches | No. of manual translated searches | No. of PST-A recall errors | No. of manual recall errors | PST-A recall errors Mean | SD | Manual recall errors Mean | SD | Mean difference |
|-----------------------------------|----------------------------------|-----------------------------------|----------------------------|-----------------------------|--------------------------|----|---------------------------|----|-----------------|
| PubMed to Web of Science          | 4                                | 7                                 | 0                          | 0                           | 0                        | 0  | 0                         | 0  | 0               |
| PubMed to Scopus                  | 4                                | 4                                 | 0                          | 30                          | 0                        | 0  | 8                         | 12 | -8              |
| PubMed to Ovid MEDLINE            | 14                               | 15                                | 2                          | 1                           | 0                        | 0  | 0                         | 0  | 0               |
| PubMed to Embase                  | 6                                | 4                                 | 0                          | 1                           | 0                        | 0  | 0                         | 1  | 0               |
| PubMed to Cochrane                | 8                                | 9                                 | 0                          | 1                           | 0                        | 0  | 0                         | 0  | 0               |
| PubMed to CINAHL                  | 8                                | 8                                 | 9                          | 24                          | 1                        | 3  | 3                         | 8  | -2              |
| PubMed to all databases           | 44                               | 47                                | 11                         | 57                          | 0                        | 1  | 1                         | 5  | -1              |
| Ovid MEDLINE to Web of Science    | 17                               | 15                                | 8                          | 18                          | 0                        | 1  | 1                         | 3  | -1              |
| Ovid MEDLINE to Scopus            | 14                               | 21                                | 4                          | 259                         | 0                        | 1  | 12                        | 27 | -12             |
| Ovid MEDLINE to PubMed            | 42                               | 48                                | 135                        | 261                         | 3                        | 14 | 5                         | 15 | -2              |
| Ovid MEDLINE to Embase            | 20                               | 16                                | 21                         | 101                         | 1                        | 3  | 6                         | 21 | -5              |
| Ovid MEDLINE to Cochrane          | 19                               | 30                                | 43                         | 459                         | 2                        | 4  | 15                        | 29 | -13             |
| Ovid MEDLINE to CINAHL            | 18                               | 15                                | 4                          | 52                          | 0                        | 1  | 3                         | 9  | -3              |
| Ovid MEDLINE to all databases     | 130                              | 145                               | 215                        | 1150                        | 2                        | 8  | 8                         | 21 | -6              |
| All translations to all databases | 174                              | 192                               | 226                        | 1207                        | 1                        | 7  | 6                         | 18 | -5              |

Abbreviation: PST-A=Polyglot Search Translator-assisted; SD=Standard deviation.

**Table S7** Full list of number and percent of unique errors in search string translations

| Error category                                  | PST-A method translations (n=174) |       | Manual method translations (n=192) |       |
|-------------------------------------------------|-----------------------------------|-------|------------------------------------|-------|
|                                                 | n                                 | (%)   | n                                  | (%)   |
| Wrong wildcard or truncation syntax: recall*    | 30                                | (17%) | 28                                 | (15%) |
| Incorrect subject term conversion: recall       | 16                                | (9%)  | 11                                 | (6%)  |
| Not exploding a subject term: recall*           | 14                                | (8%)  | 15                                 | (8%)  |
| Missing or added wildcard or truncation: recall | 12                                | (7%)  | 25                                 | (13%) |
| Incorrect field syntax used: recall*            | 12                                | (7%)  | 7                                  | (4%)  |
| Incorrect search structure: recall*             | 11                                | (6%)  | 12                                 | (6%)  |
| Incorrect field chosen: precision*              | 10                                | (6%)  | 31                                 | (16%) |
| Out of place characters inserted: recall*       | 10                                | (6%)  | 6                                  | (3%)  |
| Incorrect field chosen: recall*                 | 9                                 | (5%)  | 31                                 | (16%) |
| Incorrect phrase translation: recall*           | 9                                 | (5%)  | 9                                  | (5%)  |
| Missing subject term: recall                    | 8                                 | (5%)  | 16                                 | (8%)  |
| Spelling mistake in search: recall              | 8                                 | (5%)  | 15                                 | (8%)  |
| Missing keyword term: recall                    | 7                                 | (4%)  | 25                                 | (13%) |
| Incorrect adjacency syntax: recall*             | 7                                 | (4%)  | 1                                  | (1%)  |
| Incorrect subject term conversion: precision    | 6                                 | (3%)  | 2                                  | (1%)  |
| Exploding a subject term: precision*            | 5                                 | (3%)  | 24                                 | (13%) |
| Term truncated at wrong point: recall           | 5                                 | (3%)  | 12                                 | (6%)  |
| Incorrect phrase translation: precision*        | 4                                 | (2%)  | 25                                 | (13%) |
| Incorrect adjacency used: precision             | 4                                 | (2%)  | 9                                  | (5%)  |

| Error category                                     | PST-A method translations (n=174) |      | Manual method translations (n=192) |      |
|----------------------------------------------------|-----------------------------------|------|------------------------------------|------|
|                                                    | n                                 | (%)  | n                                  | (%)  |
| Not restricted to major subject term: precision*   | 3                                 | (2%) | 5                                  | (3%) |
| Restricted to major subject term: recall*          | 3                                 | (2%) | 4                                  | (2%) |
| Incorrect or missing Boolean operator: recall      | 3                                 | (2%) | 1                                  | (1%) |
| Incorrect field syntax used: precision*            | 2                                 | (1%) | 1                                  | (1%) |
| Extra components added: precision                  | 2                                 | (1%) | 1                                  | (1%) |
| Missing keyword term: precision                    | 2                                 | (1%) | 0                                  | (—)  |
| Incorrect adjacency used: recall                   | 1                                 | (1%) | 4                                  | (2%) |
| Term truncated at wrong point: precision           | 1                                 | (1%) | 3                                  | (2%) |
| Missing subject term: precision                    | 1                                 | (1%) | 2                                  | (1%) |
| Extra components added: recall                     | 1                                 | (1%) | 0                                  | (—)  |
| Missing or added wildcard or truncation: precision | 0                                 | (—)  | 2                                  | (1%) |
| Incorrect adjacency syntax: precision*             | 0                                 | (—)  | 1                                  | (1%) |
| Incorrect search structure: precision*             | 0                                 | (—)  | 1                                  | (1%) |
| <b>Total</b>                                       | <b>206</b>                        |      | <b>329</b>                         |      |

Abbreviation: PST-A=Polyglot Search Translator-assisted; \*=Error identified and fixed in the PST after trial completion.
