# Supplementary material for: Improving the translation of search strategies using the Polyglot Search Translator: a randomized controlled trial
Source: PubMed Central journal article supplement (PMC7069833; doi:10.5195/jmla.2020.834), 2020-04-01
Supplement: jmla-108-195-s008.pdf [file jmla-108-195-s008.pdf]

## Improving the translation of search strategies using the Polyglot Search Translator: a randomized controlled trial

Justin Michael Clark; Sharon Sanders; Matthew Carter; David Honeyman; Gina Cleo; Yvonne Auld; Debbie Booth; Patrick Condrón; Christine Dalais; Sarah Bateup; Bronwyn Linthwaite; Nikki May; Jo Munn; Lindy Ramsay; Kirsty Rickett; Cameron Rutter; Angela Smith; Peter Sondergeld; Margie Wallin; Mark Jones; Elaine Beller

### APPENDIX H

**Table S8** Median percentage difference in the number of references retrieved relative to the number of references retrieved by the reference standard (with ranges)

| Translation scenario           | PST-A method        |                      | Manual method       |                     |
|--------------------------------|---------------------|----------------------|---------------------|---------------------|
|                                | Median % difference | Range                | Median % difference | Range               |
| PubMed to Web of Science       | -1.47               | (-87.3 to 600.0)     | 22.8                | (-77.2 to 625.7)    |
| PubMed to Scopus               | 768.3               | (-95.2 to 18,700.0)  | 46.1                | (0.8 to 28,000)     |
| PubMed to Ovid MEDLINE         | -12.9               | (-66.7 to 82.4)      | -17.3               | (-57.8 to 160.2)    |
| PubMed to Embase               | -2.5                | (-60.7 to 86.6)      | -17.9               | (-37.9 to 19.8)     |
| PubMed to Cochrane             | -1.1                | (-100.0 to 486.9)    | 34.6                | (-48.5 to 1,467.2)  |
| PubMed to CINAHL               | 13.8                | (-38.6 to 1,262.5)   | 43.0                | (-4.6 to 300.0)     |
| PubMed to all databases        | -1.5                | (-100.0 to 18,700)   | 2.1                 | (-77.2 to 28,000.0) |
| Ovid MEDLINE to Web of Science | 11.7                | (-75.9 to 596.7)     | 7.0                 | (-78.3 to 731.9)    |
| Ovid MEDLINE to Scopus         | 22.5                | (-41.2 to 2,012.5)   | 21.9                | (-91.4 to 7,424.8)  |
| Ovid MEDLINE to PubMed         | 2.4                 | (-98.8 to 753.1)     | 20.4                | (-97.5 to 4,658.5)  |
| Ovid MEDLINE to Embase         | -23.1               | (-99.6 to 7.2)       | -12.4               | (-89.7 to 13.7)     |
| Ovid MEDLINE to Cochrane       | 2.4                 | (-100.0 to 39,716.7) | 1.4                 | (-98.9 to 1,562.9)  |
| Ovid MEDLINE to CINAHL         | 40.6                | (-84.9 to 563.0)     | 104.0               | (-36.6 to 2,984.7)  |

| Translation scenario              | PST-A method        |                      | Manual method       |                    |
|-----------------------------------|---------------------|----------------------|---------------------|--------------------|
|                                   | Median % difference | Range                | Median % difference | Range              |
| Ovid MEDLINE to all databases     | 3.0                 | (-100.0 to 39,716.7) | 7.0                 | (-98.9 to 4,658.5) |
| All translations to all databases | 1.7                 | (-100.0 to 39,716.7) | 6.3                 | (-98.9 to 4,658.5) |

Abbreviation: PST-A=Polyglot Search Translator-assisted.
